# Supplementary material for: A Theoretical Investigation of the Polyaddition of an AB2+A2+B4 Monomer Mixture
Source: MDPI journal article supplement (doi:10.3390/polym16030426), 2024-02-03
Supplement: s1 [file s1]

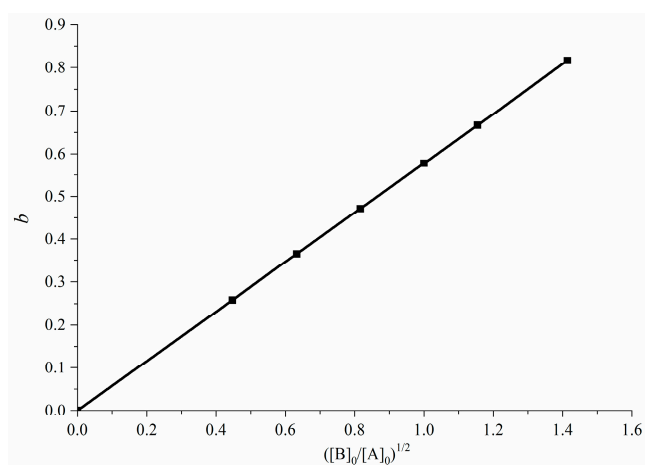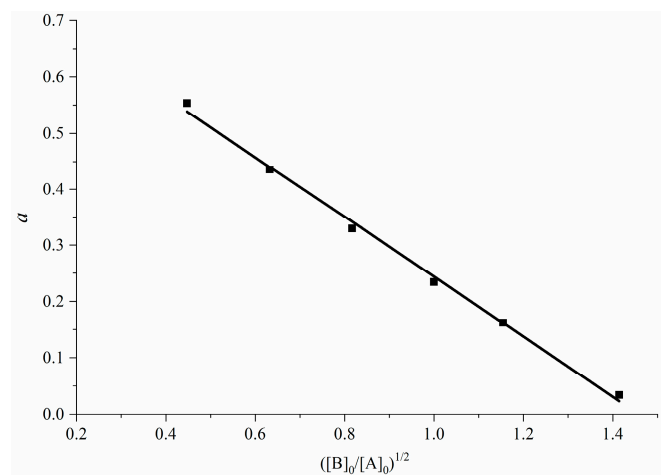

(a) (b)  
Figure S1. Plot of the constant term  $b$  (a) and the slope coefficient  $a$  (b) as a function of  $([B]_0/[A]_0)^{1/2}$ .

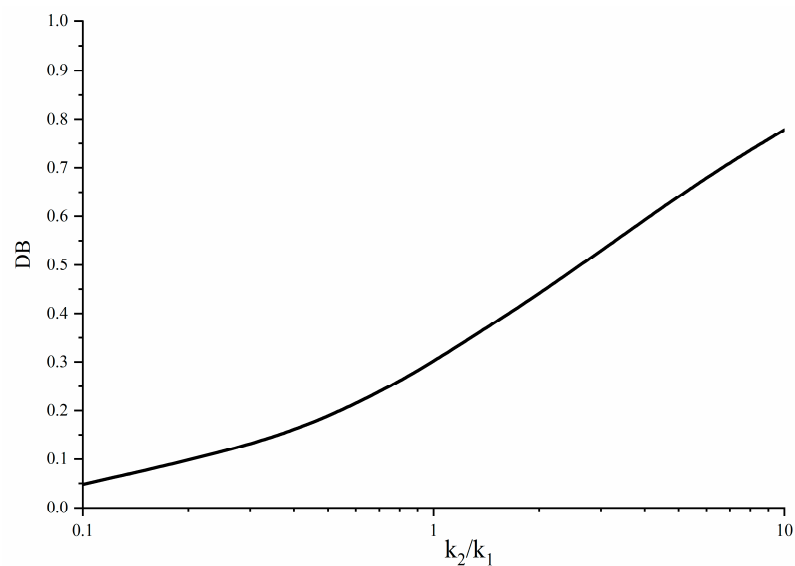

Figure S2. Plot of DB vs  $k_2/k_1$ ; the ratio of monomer mixture polyaddition  $[AB_2]_0/[A_2]_0/[B_4]_0 = 0.63/0.060/0.31$ .

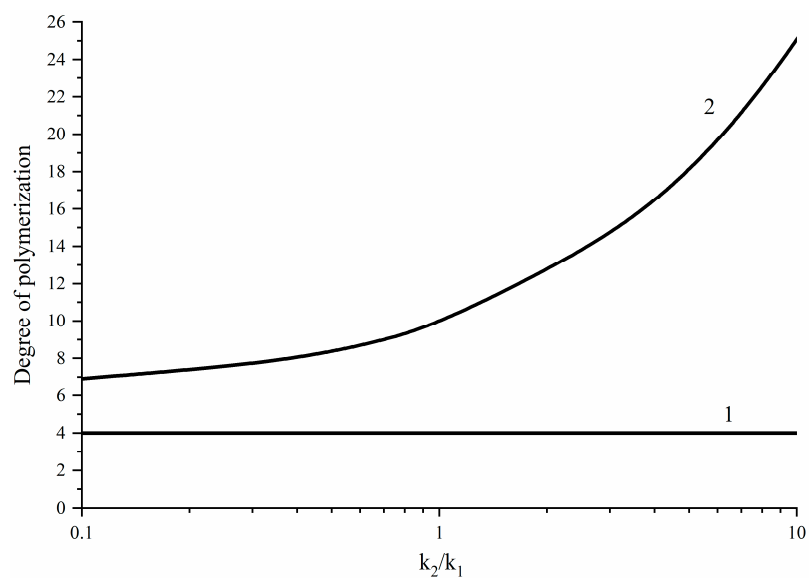

Figure S3. Plot of  $DP_n - 1$  and  $DP_w - 2$  vs  $k_2/k_1$  ratio during the polyaddition of the monomer mixture  $[AB_2]_0/[A_2]_0/[B_4]_0 = 0.63/0.060/0.31$ .
